# Supplementary material for: Near infrared-emitting persistent luminescence nanoparticles@macrophages as cell-based carriers for precise imaging-guided cancer cell ablation
Source: Royal Society of Chemistry journal article supplement (doi:10.1039/d3nj02936k), 2024-01-01
Supplement: d3nj02936k1.pdf [file d3nj02936k1.pdf]

## Supporting information

### **Near infrared-emitting persistent luminescence nanoparticles@macrophage as cell-based carrier for precisely imaging-guided cancer cell ablation**

Hua Wang<sup>1</sup>, Jie Zhang<sup>2†</sup>, Bin Zheng<sup>3</sup>, Zirui Yang<sup>1</sup>, Jiayi Sun<sup>1</sup>, Xiao  
Liu<sup>4\*</sup>, Niansong Qian<sup>5\*</sup>

<sup>1</sup>School of Pharmaceutical Science and Technology, Tianjin University, Tianjin  
300072, China

<sup>2</sup>Key Laboratory of Cellular Physiology at Shanxi Medical University, Ministry of  
Education, and the Department of Physiology, Shanxi Medical University, Taiyuan,  
China.

<sup>3</sup>Academy of Medical Engineering and Translational Medicine, Tianjin Key  
Laboratory of Brain Science and Neural Engineering, Xincheng Hospital of Tianjin  
University, Tianjin University, Tianjin 300072, China.

<sup>4</sup>Tianjin Neurological Institute, Tianjin Medical University General Hospital, Tianjin,  
300052, China

<sup>5</sup> Department of Respiratory, the Eighth Medical Center of Chinese PLA General  
Hospital, Beijing 100853, China

† These authors contributed equally.

\*Corresponding authors.

E-mail addresses: [liuxiao1220@hotmail.com](mailto:liuxiao1220@hotmail.com) (Xiao Liu)

\*Corresponding authors.

E-mail addresses: [qianniandong1@163.com](mailto:qianniandong1@163.com) (Niansong Qian)

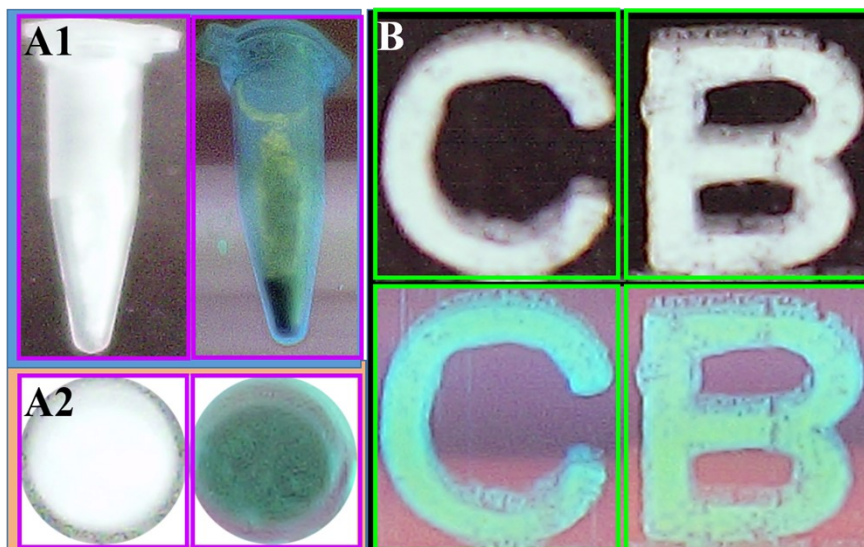

Fig. S1: The images of mZGC captured using an infrared night-vision scope. (A1) The mZGC powder in centrifuge tube; (A2) The mZGC powder in 96-well plate; (B) The mZGC powder as ink was printed on the hard paper to form an image of “CB” letters.

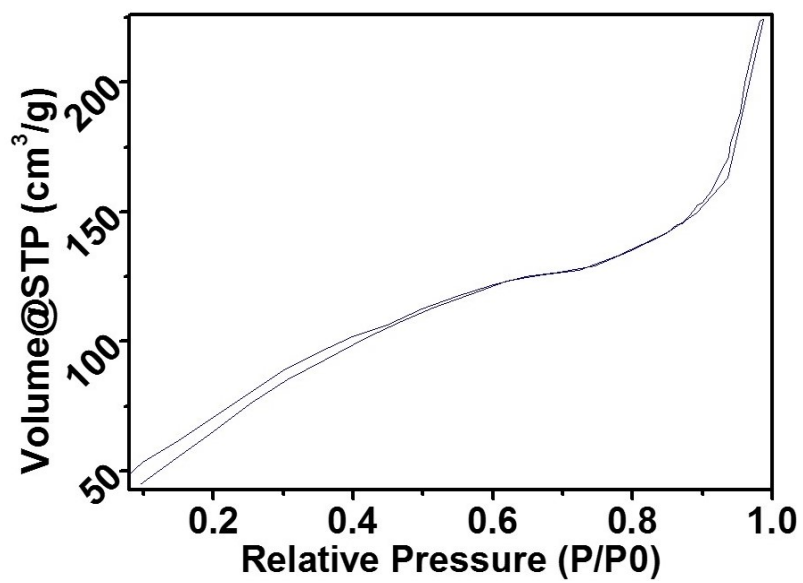

Fig. S2: The N<sub>2</sub> adsorption–desorption isotherms of MSN.

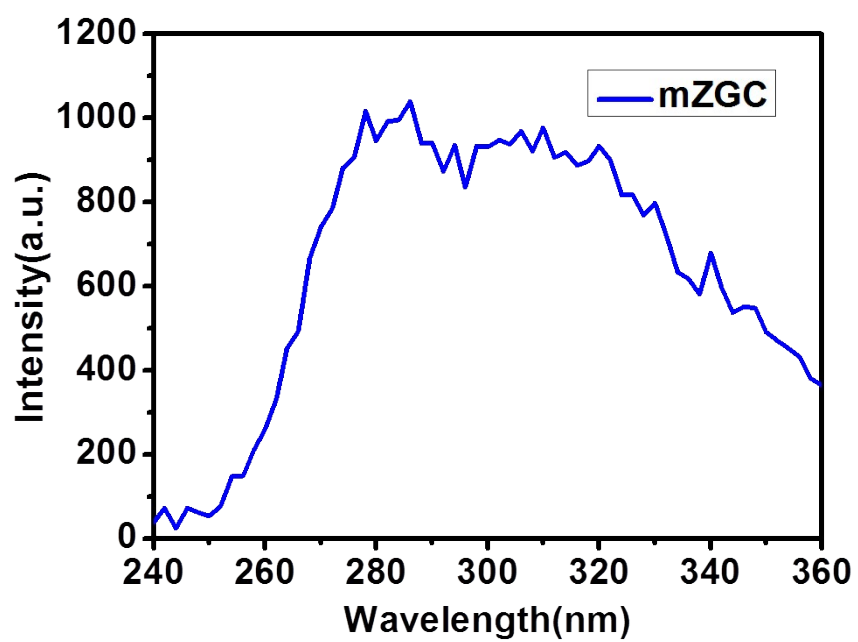

Fig. S3:

The persistent luminescence excitation spectrum of mZGC.

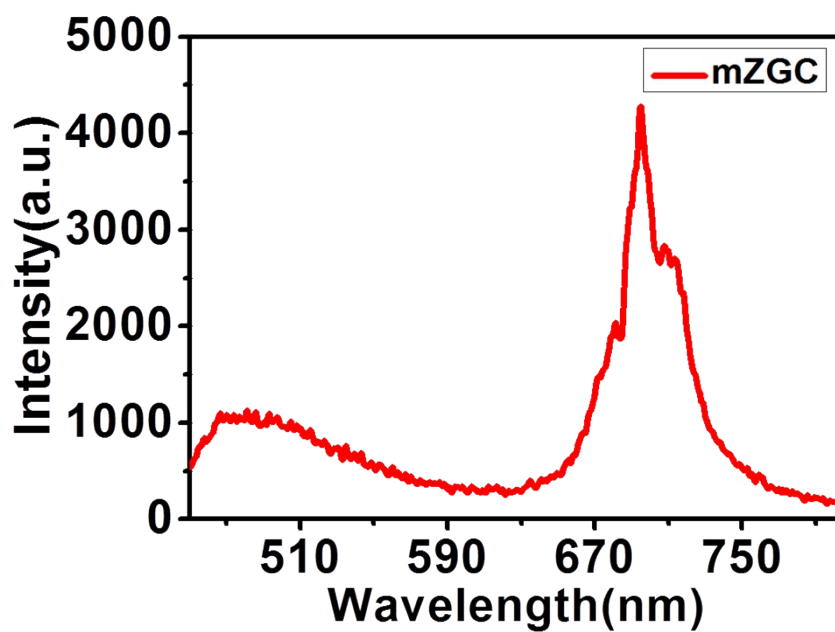

Fig. S4: The persistent luminescence emission spectrum of mZGC.

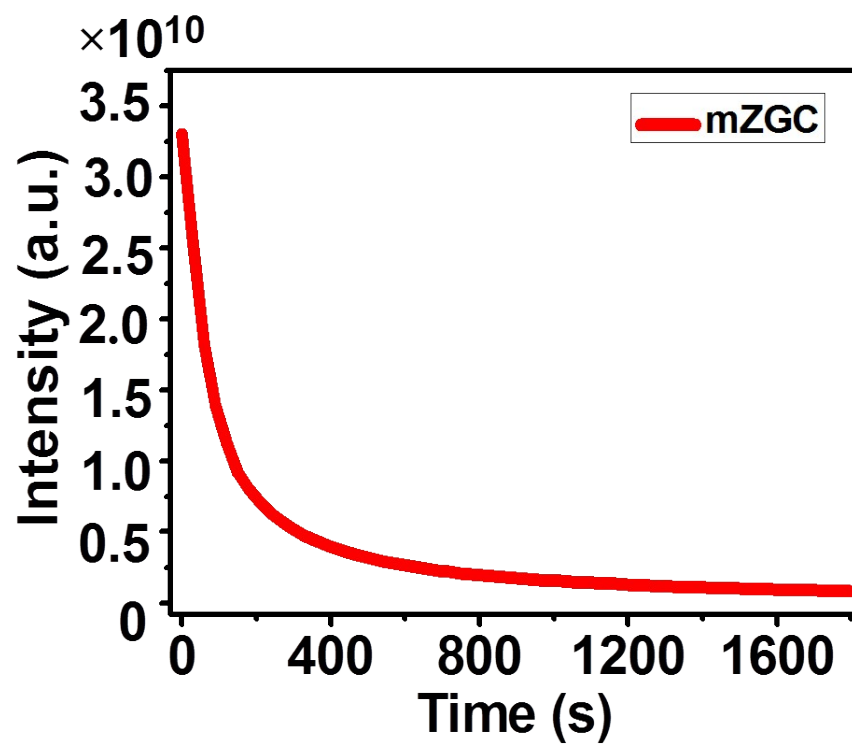

Fig. S5: The persistent luminescence decay curve of mZGC.

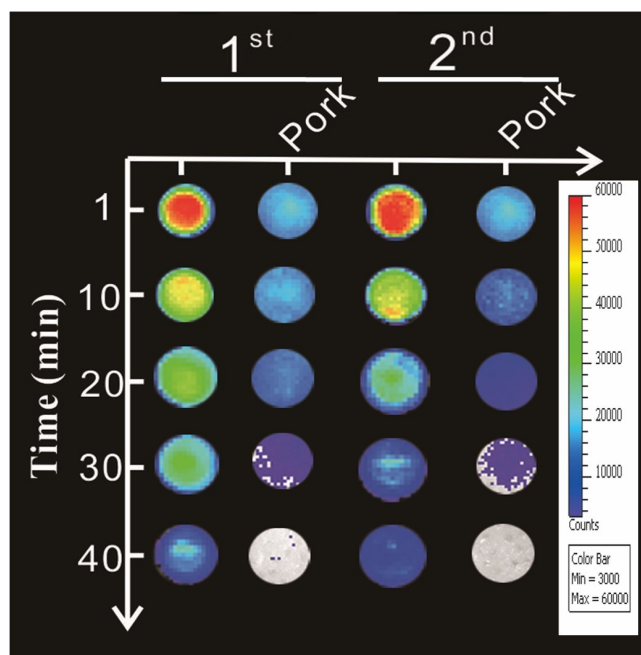

Fig. S6: The NIR-persistent luminescence images of mZGC nanoparticles within 40 min after irradiating with composite light of LED lamp for 10 min. After recharging, there was still intense luminescence and the NIR-persistent luminescence could penetrate 3 mm pork rind.



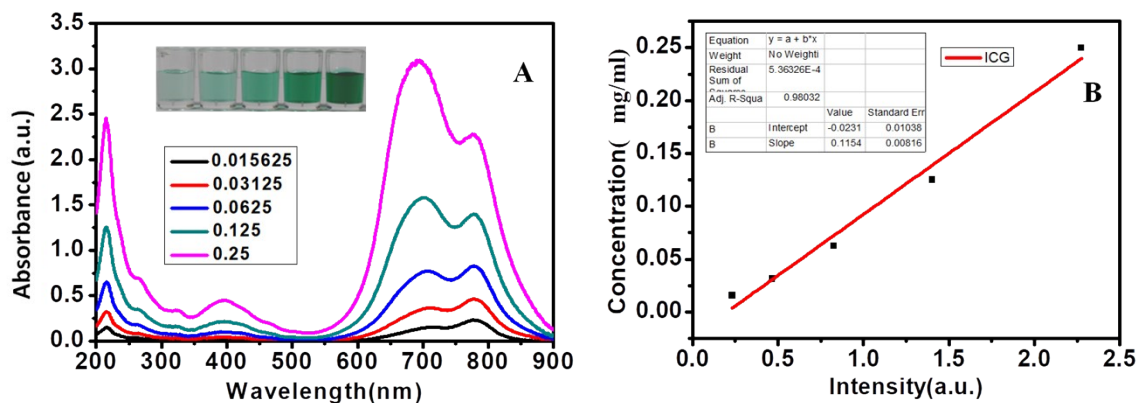

Fig. S7: (A) UV-Vis absorption spectra of pure ICG and (B) concentration standard curve of ICG. The formula of this standard curve was:  $y=0.1154x-0.0231$  (x: the UV-Vis absorption value of ICG; y: the concentraton of ICG).

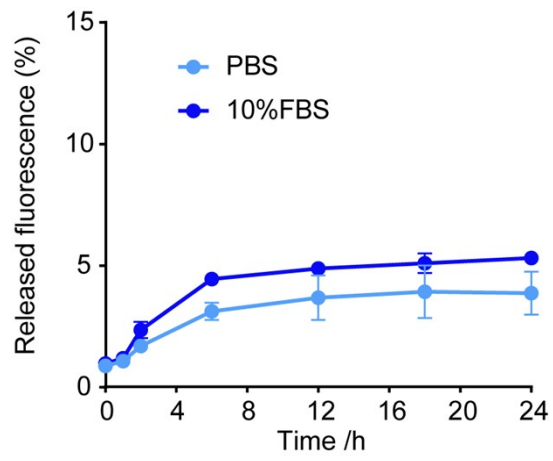

Fig. S8: Stability of ICG@mZGC in PBS and 10% FBS.

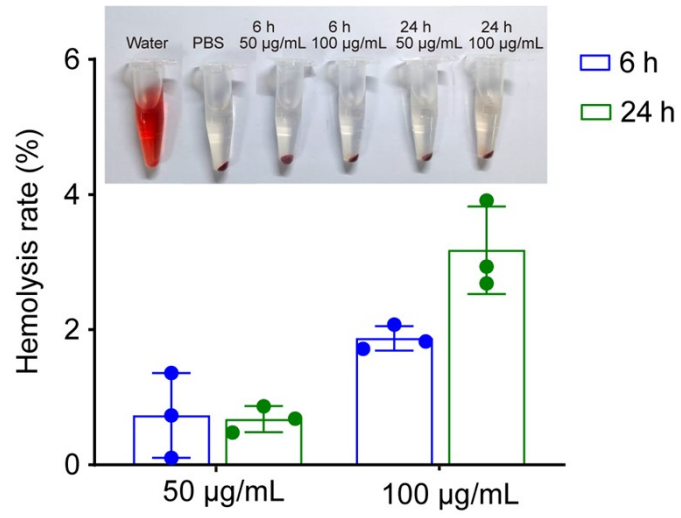

Fig. S9: Hemolysis test of each group in different concentrations of ICG@mZGC at 6 h and 24 h.

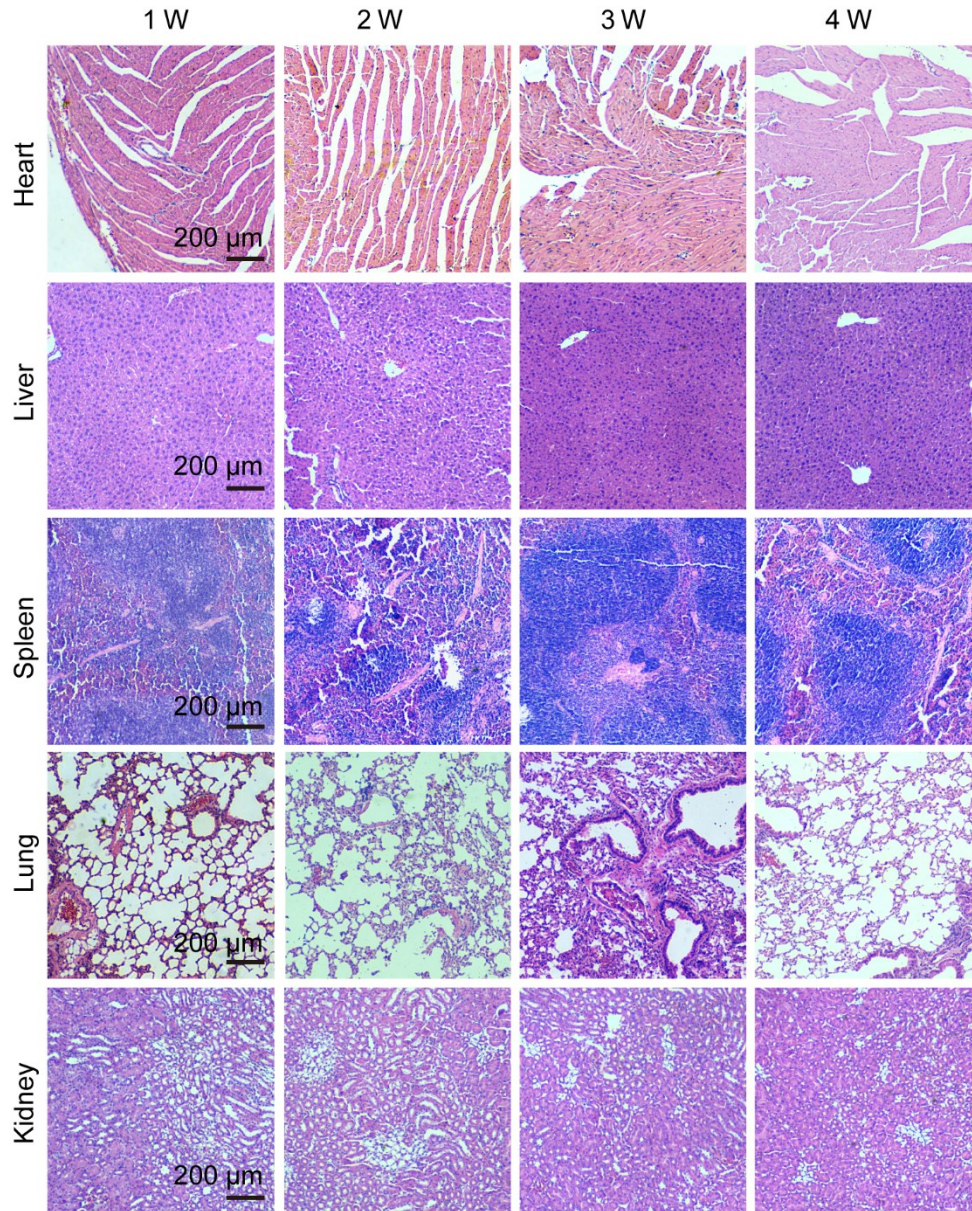

Fig. S10: Histological examination of mouse tissues after repeated intranasal administrated of ICG@mZGC. C57BL/6J mice were administered by i. v. twice a week for 4 weeks. The major organs were examined at 1, 2, 3, and 4 weeks.

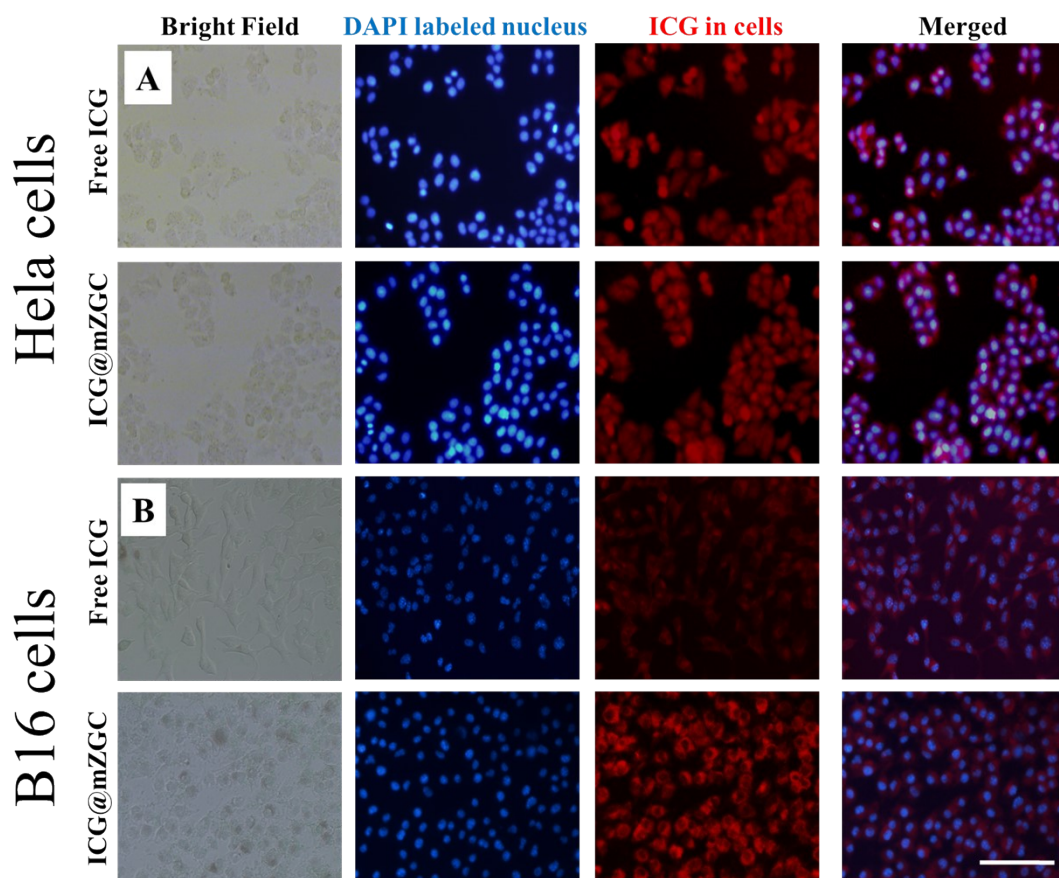

Fig. S11: Free ICG and ICG@mZGC uptaked by (A) Hela cells and (B) B16 cells. The scale bars were 200  $\mu\text{m}$ .



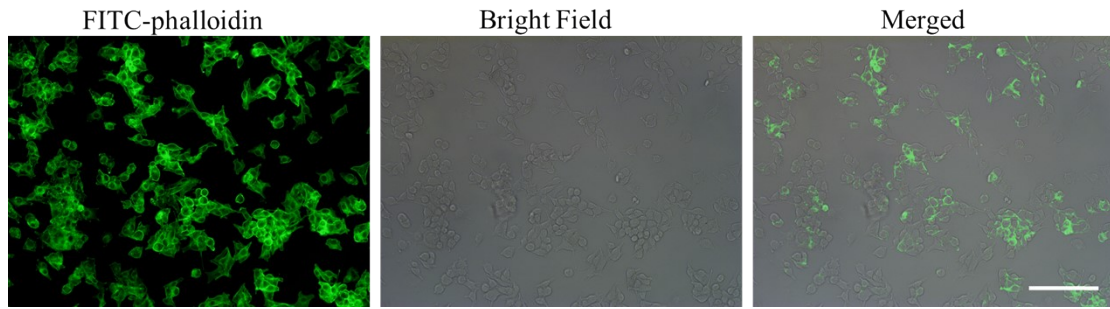

Fig. S12: The fluorescence images of B16 cells stained by FITC-phalloidin, which was used for testing the macrophages phagocytosis activity. The scale bars were 200  $\mu\text{m}$ .
